# Supplementary material
Source: publisher figshare collection journal article supplement (https://sage.figshare.com/ndownloader/files/20556570)
Supplement: Supplementary file 1 [file 20556570]

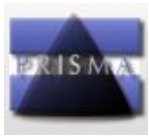

## PRISMA 2009 Flow Diagram

### Systematic review of household water conservation interventions using the information-motivation-behavioral skills model

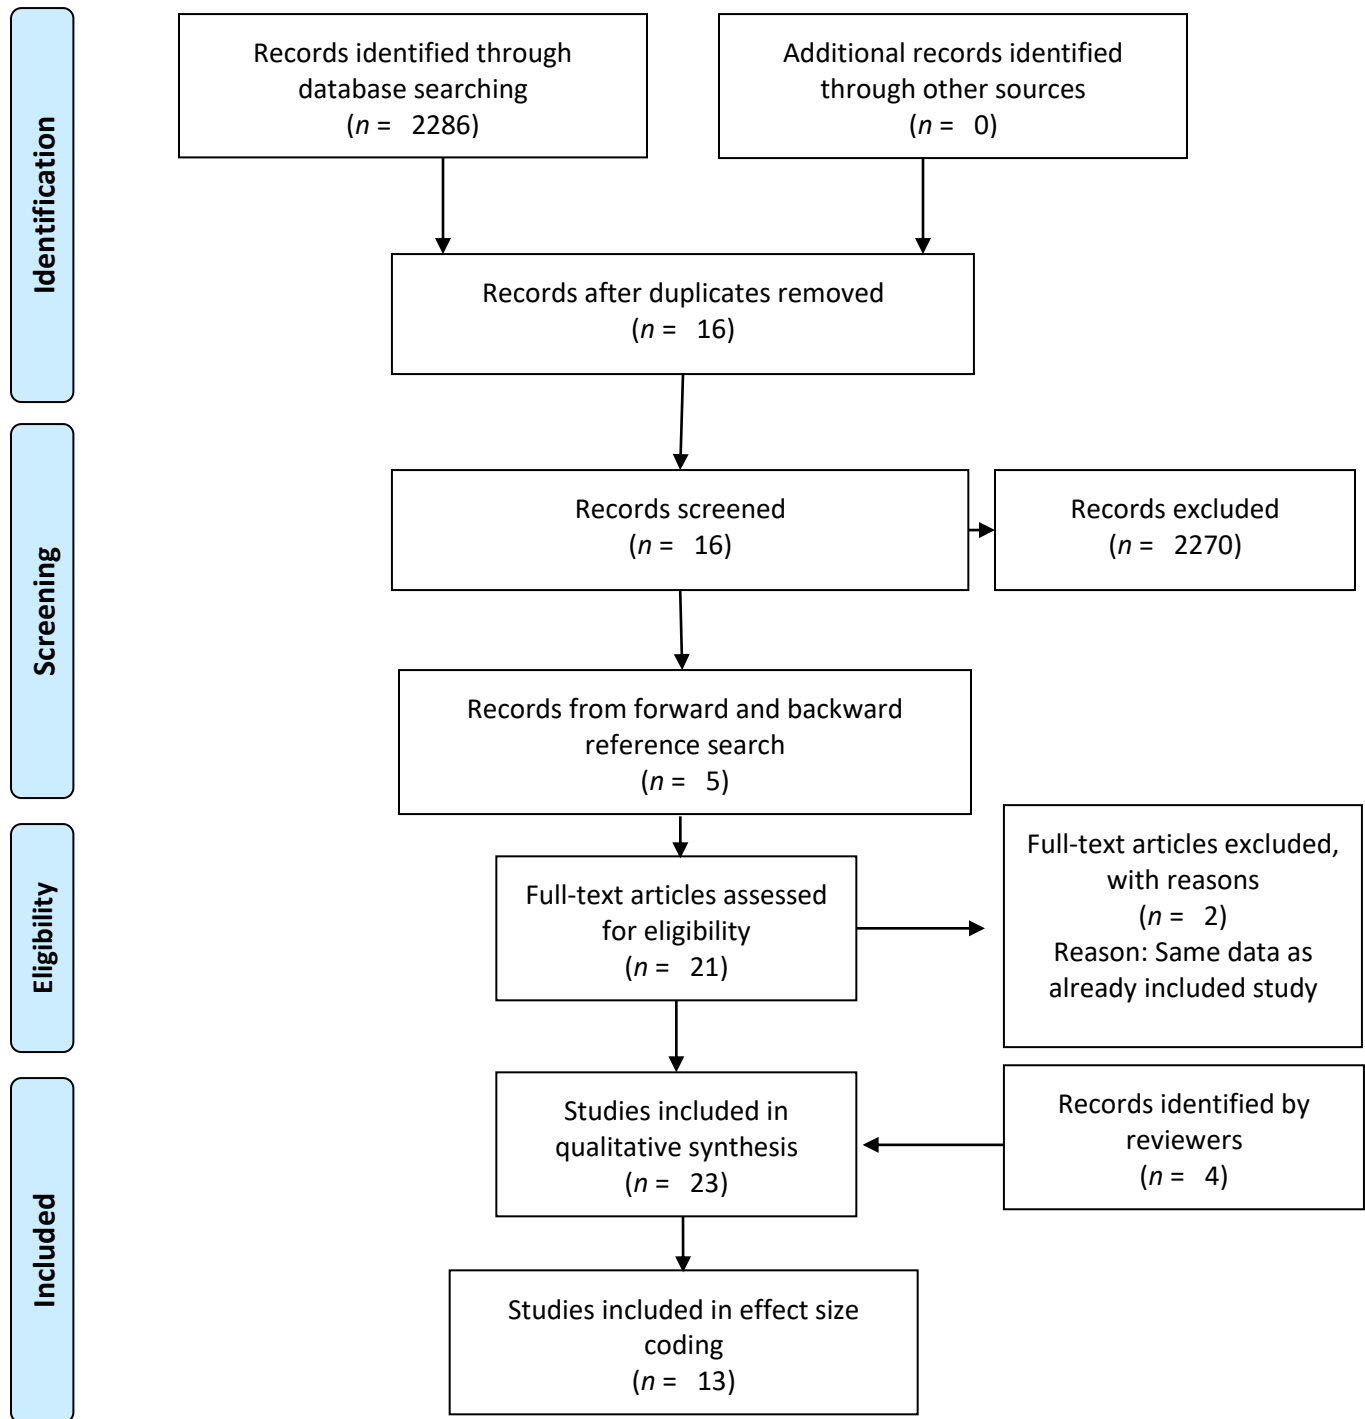

Note, the records identified by reviewers should have been identified with the forward and backward search, but the software used for these searches did not detect these.
